# Supplementary material for: Network Analyses and Data Integration of Proteomics and Metabolomics From Leaves of Two Contrasting Varieties of Sugarcane in Response to Drought
Source: Front Plant Sci. 2019 Nov 28;10:1524. doi: 10.3389/fpls.2019.01524 (PMC6892781; doi:10.3389/fpls.2019.01524)
Supplement: Supplementary Table 2 — Proteins differentially abundant identified by one-way Anova (FDR adjusted p ≤ 0.05) in the drought-tolerant variety CTC15. [file Table_2.xlsx]

## Sheet: Anova CTC
Supplementary Table 2. Proteins differentially abundant (Anova p ≤ 0.05) in CTC variety
Protein ID	Seq. Description	p.value	FDR	Fisher's LSD	GOs
SCAGFL1089C03	glutathione s-transferase gstf2	5.8211e-05	0.0011183	CTC_12DI - CTC_PI; CTC_4DI - CTC_PI	P:response to stress; P:catabolic process; P:cellular process; P:metabolic process
SCAGLR1021H11	nadh-ubiquinone oxidoreductase 13 kda-b subunit	1.0432e-05	0.00025386	CTC_12DI - CTC_PI; CTC_4DI - CTC_PI	P:generation of precursor metabolites and energy
SCAGLR1043F11	ribosomal protein rps20	7.5341e-09	2.75e-06	CTC_4DI - CTC_12DI; CTC_PI - CTC_12DI	P:translation
SCBFLR1026E01	60s ribosomal protein l10-3	7.7301e-05	0.0014469	CTC_12DI - CTC_PI; CTC_4DI - CTC_PI	P:translation
SCBFRZ2017C12	zeaxanthin epoxidase	1.2317e-06	5.6195e-05	CTC_12DI - CTC_4DI; CTC_PI - CTC_4DI	P:biosynthetic process; P:cellular process; P:lipid metabolic process; P:secondary metabolic process; P:metabolic process
SCBGLR1003E05	glutathione s-transferase	0.0012204	0.019366	CTC_12DI - CTC_PI; CTC_4DI - CTC_PI	P:response to stress; P:catabolic process; P:cellular process; P:metabolic process
SCBGLR1114F09	chitinase iii-like protein	0.0016288	0.025299	CTC_4DI - CTC_12DI; CTC_4DI - CTC_PI
SCCCCL3003D04.b	elongation factor 2	8.5055e-06	0.0002141	CTC_4DI - CTC_12DI; CTC_PI - CTC_12DI; CTC_4DI - CTC_PI	P:translation; P:catabolic process; P:nucleobase-containing compound metabolic process
SCCCCL3080D07	40s ribosomal protein s20	2.321e-07	2.419e-05	CTC_12DI - CTC_PI; CTC_4DI - CTC_PI	P:translation
SCCCCL3140B12	60s ribosomal protein l4	2.8015e-06	0.00010226	CTC_12DI - CTC_PI; CTC_4DI - CTC_PI	P:translation
SCCCCL4005D12	26s proteasome regulatory subunit	3.3836e-08	4.9401e-06	CTC_12DI - CTC_PI; CTC_4DI - CTC_PI	P:translation; P:catabolic process; P:protein metabolic process
SCCCCL4006D02	dag protein	1.1905e-05	0.00028035	CTC_12DI - CTC_PI; CTC_4DI - CTC_PI
SCCCCL4015B08	skp1-like protein 1a	5.4765e-05	0.0010805	CTC_12DI - CTC_PI; CTC_4DI - CTC_PI	P:protein metabolic process; P:catabolic process; P:cellular process
SCCCLR1C05F08	fumarate hydratase chloroplastic-like	3.6232e-06	0.00011133	CTC_12DI - CTC_PI; CTC_4DI - CTC_PI	P:metabolic process; P:cellular process; P:generation of precursor metabolites and energy; P:catabolic process
SCCCLR1C10C03	eukaryotic translation initiation factor 3 subunit 1 35kda	4.2309e-06	0.00011879	CTC_4DI - CTC_12DI; CTC_PI - CTC_12DI	P:translation
SCCCLR2002G02	d-3-phosphoglycerate dehydrogenase	0.0027267	0.041469	CTC_12DI - CTC_PI; CTC_4DI - CTC_PI	P:biosynthetic process; P:cellular amino acid metabolic process; P:metabolic process
SCCCLR2C03C10	hydroquinone glucosyltransferase	1.0364e-06	5.6195e-05	CTC_12DI - CTC_PI; CTC_4DI - CTC_PI	P:metabolic process
SCCCRT1002F07	pma1_orysj ame: full=plasma membrane atpase ame: full=proton pump	3.8431e-06	0.00011222	CTC_4DI - CTC_12DI; CTC_PI - CTC_12DI; CTC_4DI - CTC_PI	P:transport; P:biosynthetic process; P:nucleobase-containing compound metabolic process; P:catabolic process
SCCCRT1004F06	aminotransferase y4ub	0.0031831	0.047422	CTC_12DI - CTC_PI; CTC_4DI - CTC_PI	P:metabolic process
SCCCRZ1003A03	heat shock 70 kda protein	0.00048515	0.0078703	CTC_12DI - CTC_4DI; CTC_12DI - CTC_PI; CTC_4DI - CTC_PI	P:protein metabolic process; P:cellular process; P:response to stress
SCCCRZ2001D09	substrate binding domain containing expressed	1.4445e-05	0.00031014	CTC_12DI - CTC_PI; CTC_4DI - CTC_PI	P:metabolic process; P:cellular process
SCCCRZ2C04H01	ubiquitin-conjugating enzyme spm2	1.4442e-06	6.2017e-05	CTC_12DI - CTC_PI; CTC_4DI - CTC_PI
SCCCRZ3004G04	protein tolb-like	1.4572e-08	3.5458e-06	CTC_12DI - CTC_PI; CTC_4DI - CTC_PI
SCCCSD1095A07	30s ribosomal protein s9	2.2614e-06	8.6886e-05	CTC_12DI - CTC_4DI; CTC_PI - CTC_4DI	P:translation
SCCCST2001A03	unknown [Zea mays]	3.5057e-05	0.00071088	CTC_12DI - CTC_PI; CTC_4DI - CTC_PI
SCEQLR1093F09	glycosyl hydrolase family 3 n terminal domain containing expressed	1.5932e-06	6.4614e-05	CTC_12DI - CTC_PI; CTC_4DI - CTC_PI	P:carbohydrate metabolic process
SCEQRT1031A11	27k vesicle-associated membrane protein-associated	0.00010532	0.0019221	CTC_12DI - CTC_PI; CTC_4DI - CTC_PI	P:response to endogenous stimulus
SCEQRT1031E01	ribosomal protein s8	1.0915e-06	5.6195e-05	CTC_4DI - CTC_12DI; CTC_12DI - CTC_PI; CTC_4DI - CTC_PI	P:translation
SCEZHR1084D12	glycine cleavage h-protein	1.2996e-05	0.00029646	CTC_4DI - CTC_12DI; CTC_PI - CTC_12DI	P:catabolic process; P:cellular amino acid metabolic process
SCEZLR1031G05	protein phosphatase 2c	1.3674e-05	0.00030248	CTC_12DI - CTC_PI; CTC_4DI - CTC_PI	P:metabolic process
SCJFRZ2015E05	fumarylacetoacetate hydrolase domain-containing protein 1	3.5494e-06	0.00011133	CTC_12DI - CTC_PI; CTC_4DI - CTC_PI	P:metabolic process
SCJFRZ3C01H09	polygalacturonase precursor	5.5741e-06	0.00015071	CTC_12DI - CTC_4DI; CTC_PI - CTC_4DI	P:carbohydrate metabolic process
SCJLRT1019H04	aspartate aminotransferase	1.0236e-06	5.6195e-05	CTC_12DI - CTC_PI; CTC_4DI - CTC_PI	P:biosynthetic process; P:cellular amino acid metabolic process
SCJLRZ1024A04	af465643_1 lipoxygenase	2.6509e-07	2.419e-05	CTC_12DI - CTC_PI; CTC_4DI - CTC_PI	P:biosynthetic process; P:cellular process; P:lipid metabolic process; P:metabolic process
SCQGLR1019B02	ferredoxin-sulfite reductase precursor	4.2436e-07	3.442e-05	CTC_12DI - CTC_PI; CTC_4DI - CTC_PI	P:metabolic process
SCQGRT1039F06	vacuolar atpase b subunit	0.000259	0.0043969	CTC_12DI - CTC_PI; CTC_4DI - CTC_PI	P:transport; P:cellular process; P:nucleobase-containing compound metabolic process; P:biosynthetic process; P:generation of precursor metabolites and energy
SCQSLR1018C05	act2_orysi ame: full=actin-2	0.00018214	0.0031658	CTC_12DI - CTC_PI; CTC_4DI - CTC_PI
SCRFLR1012C07	60s ribosomal protein	1.2913e-07	1.5711e-05	CTC_12DI - CTC_PI; CTC_4DI - CTC_PI	P:translation
SCRFLR1012G11	prostaglandin e synthase 3	1.0713e-06	5.6195e-05	CTC_12DI - CTC_PI; CTC_4DI - CTC_PI
SCRUFL1114B10.b	nadph-dependent reductase	3.6602e-06	0.00011133	CTC_12DI - CTC_4DI; CTC_PI - CTC_4DI
SCRULB1060G07	prli-interacting factor l-like	0.00048077	0.0078703	CTC_12DI - CTC_PI; CTC_4DI - CTC_PI
SCSGFL1078A06.b	endoplasmin precursor	1.5783e-05	0.0003292	CTC_12DI - CTC_PI; CTC_4DI - CTC_PI	P:protein metabolic process; P:cellular process; P:response to stress
SCSGHR1072F02	peroxidase 70 precursor	3.1455e-06	0.00010934	CTC_4DI - CTC_12DI; CTC_PI - CTC_12DI	P:response to stress; P:catabolic process; P:cellular process; P:metabolic process
SCUTLR2008B03	hypothetical protein SORBIDRAFT_09g026550 [Sorghum bicolor]	7.226e-06	0.00018839	CTC_12DI - CTC_4DI; CTC_PI - CTC_4DI
SCUTLR2023D11	aldehyde dehydrogenase family 7 member a1	1.8245e-09	1.3319e-06	CTC_12DI - CTC_PI; CTC_4DI - CTC_PI	P:metabolic process
SCVPCL6043F04	fumarylacetoacetate hydrolase domain-containing protein 1	1.1986e-06	5.6195e-05	CTC_4DI - CTC_12DI; CTC_PI - CTC_12DI	P:metabolic process
SCVPLB1020E07	elongation factor 1-alpha	8.355e-07	5.6195e-05	CTC_12DI - CTC_PI; CTC_4DI - CTC_PI	P:translation; P:catabolic process; P:nucleobase-containing compound metabolic process
SCVPLR1049F01	26s proteasome regulatory particle triple-a atpase subunit5a	0.00017831	0.0031658	CTC_12DI - CTC_PI; CTC_4DI - CTC_PI	P:translation; P:catabolic process; P:protein metabolic process
SCVPLR2019F01	60s ribosomal protein l11-1	2.8503e-08	4.9401e-06	CTC_12DI - CTC_4DI; CTC_PI - CTC_4DI	P:translation
